# Supplementary material for: Whole genomic approach in mutation discovery of infantile spasms patients
Source: Frontiers journal article supplement (doi:10.3389/fneur.2022.944905), 2022-07-22
Supplement: Image_1.PDF [file Image_1.PDF]

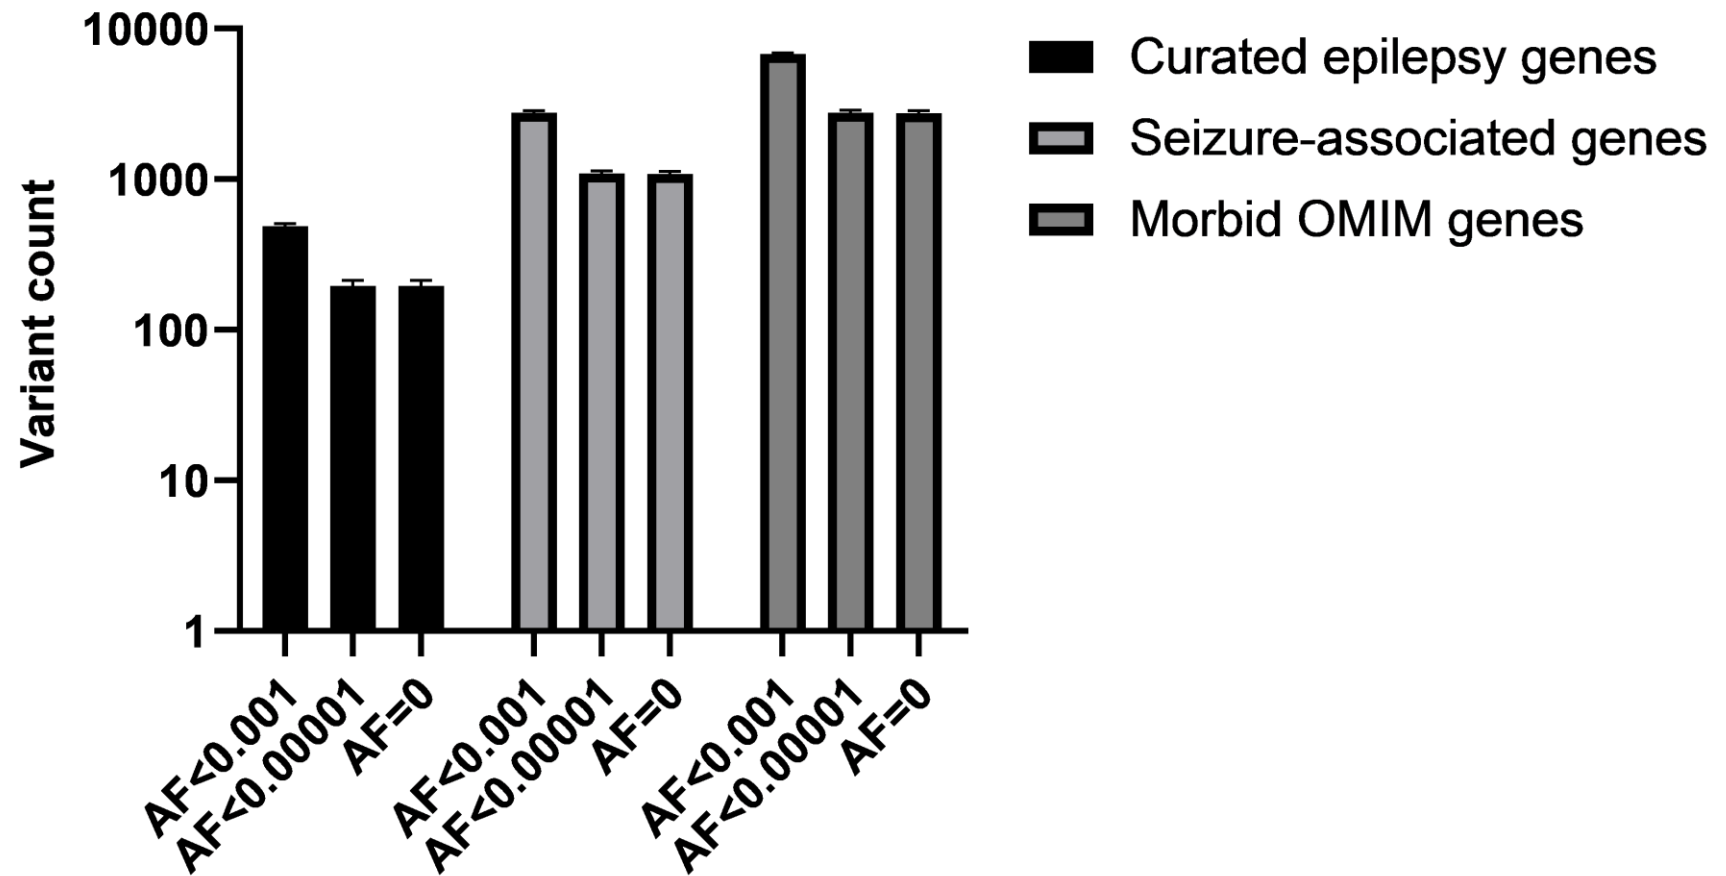

**Supplementary Figure S1 . Sequence variant filtration by allele frequency.** Mean variant counts were visualized in bar plots when different filters were used. We applied allele three different levels of frequency (AF) filtrations to variants on curated epilepsy, seizure-associated, and morbid OMIM genes, respectively.
