# Supplementary material for: Whole genomic approach in mutation discovery of infantile spasms patients
Source: Front Neurol. 2022 Jul 22;13:944905. doi: 10.3389/fneur.2022.944905 (PMC9354570; doi:10.3389/fneur.2022.944905)
Supplement: Supplementary file 2 [file Table_1.XLSX]

## Sheet: Table S1
Supplementary Table S1. Clinical information of study patients
Sample	Gender	Onset age (mo)	Ethnic group	Electroencephalogram findings	Brain MRI findings	Anti-seizure medication at last follow-up (age, yr)	Developmental delay or intellectual disability
IS01	Male	4	Korean	interictal: hypsarrythmia, ictal: diffuse delta bursts and electrodecremental pattern	Within normal limits	None (3.8)	not definite
IS02	Female	4	Korean	interictal: hypsarrythmia, ictal: diffuse delta bursts and electrodecremental pattern	Within normal limits	LEV (6.1)	yes
IS03	Male	5	Korean	interictal: atypical hypsarrythmia, ictal: diffuse delta bursts and electrodecremental pattern	Within normal limits	None (2.3)	yes
IS04	Female	5	Korean	interictal: hypsarrythmia, ictal: diffuse delta bursts and electrodecremental pattern	Within normal limits	None (6.4)	yes
IS05	Male	10	Mongolian	interictal: hypsarrythmia, ictal: diffuse delta bursts and electrodecremental pattern	Mild-to-moderate brain atrophy	VGB, Pd, LEV (1.3)	yes
IS06	Male	4	Korean	interictal: atypical hypsarrythmia, ictal: diffuse delta bursts and electrodecremental pattern	Subtle ill-defined T2 hyperintense lesions at the right centrum semiovale	VPA, LEV, CLB, CNZ, RUF (9.8)	yes
IS07	Male	4	Korean	interictal: atypical hypsarrythmia, ictal: diffuse delta bursts and electrodecremental pattern	Within normal limits	TPM, LTG, PER (23.2)	yes
IS08	Female	5	Korean	interictal: hypsarrythmia, ictal: diffuse delta bursts and electrodecremental pattern	Within normal limits	VPA, CNZ, CLB (10.8)	yes
IS09	Male	3	Korean	interictal: hypsarrythmia, ictal: diffuse delta bursts and electrodecremental pattern	No definite brain structural anomalies, no hemorrhage	LEV, OXC (8.6)	yes
IS10	Male	0	Korean	interictal: atypical hypsarrythmia, ictal: not done	No definite brain structural anomalies	LEV (3.1)	yes
IS11	Male	5	Korean	interictal: hypsarrythmia, ictal: diffuse delta bursts and electrodecremental pattern	Suspicious several poor demarcation of grey-white matter, subtle band-like lesion in the lateral ventricle	VGB, CLB (2.9)	yes
IS12	Female	7	Korean	interictal: atypical hypsarrythmia, ictal: not done	Suspicious slight myelination delay about 1 month	None (11.4)	no
IS13	Male	5	Korean	interictal: hypsarrythmia, ictal: diffuse delta bursts and electrodecremental pattern	Mild brain atrophy	None (2.8)	no
IS14	Male	5	Korean	interictal: hypsarrythmia, ictal: diffuse delta bursts and electrodecremental pattern	Within normal limits	LEV (1.4)	not definite
IS15	Male	11	Korean	interictal: hypsarrythmia, ictal: diffuse delta bursts and electrodecremental pattern	Within normal limits	None (2.1)	not definite
IS16	Female	9	Korean	interictal: atypical hypsarrythmia, ictal: diffuse delta bursts and electrodecremental pattern	Within normal limits	VGB (0.9)	not definite
LEV, levetiracetam; VGB, vigabatrin; Pd, prednisolone; VPA, valproic acid; CLB, clobazam; CNZ, clonazepam; RUF, rufinamide; TPM, topiramate; LTG, lamotrigine; PER, perampanel; OXC, oxcarbazepine;

## Sheet: Table S2
Supplementary Table S2. Sequencing summary of whole-genome sequencing
Sample	Total bases	Mean coverage depth (x)	% Covered genomic regions (≥15x)	% Covered genomic regions (≥30x)	% Covered genomic regions (≥45x)	% Covered genomic regions (≥60x)	# of SNPs	# of indels	# of sequence variant
IS01	171931423471	59.97	97.7	94	84.3	58.6	3795716	816099	4611815
IS01 mom	179732136212	62.69	97.4	96	90.4	65.9	3789913	797628	4587541
IS01 dad	183798654910	64.11	97.7	94.8	86.5	67.7	3800975	816891	4617866
IS02	181256366732	63.22	97.4	95.8	89.2	65.8	3802311	821276	4623587
IS02 mom	194711602289	67.92	97.4	96.1	91.3	75.1	3805491	820791	4626282
IS02 dad	176719019480	61.64	97.7	94.1	84.3	61.8	3761416	788564	4549980
IS03	168382413762	58.73	97.6	93.5	82.7	54.7	3792445	803131	4595576
IS03 mom	189337393306	66.04	97.4	96.1	90.7	71.9	3801547	822991	4624538
IS03 dad	179011036459	62.44	97.8	94.3	84.6	63.3	3804002	809651	4613653
IS04	187686378258	65.47	97.4	96	90.3	70.7	3817212	828514	4645726
IS04 mom	178641066226	62.31	97.4	95.6	88.7	63.7	3814851	820855	4635706
IS04 dad	202882577184	70.77	97.9	95.9	89.4	77.5	3802939	833215	4636154
IS05	166875765253	58.21	97.7	93.9	83.6	52.9	3827476	830622	4658098
IS05 mom	167387264860	58.38	97.4	95.6	86.8	52	3835450	815002	4650452
IS05 dad	168603061857	58.81	97.5	94	84.1	55	3830828	825893	4656721
IS06	174745198004	60.95	97.8	94.3	83.9	59.2	3812816	829914	4642730
IS06 mom	189097565522	65.96	97.4	96.2	91.2	72.5	3800569	828969	4629538
IS06 dad	182741195789	63.74	97.8	94.9	86.5	67	3802925	820679	4623604
IS07	166869813876	58.2	97.6	93.2	81.6	53.3	3784280	788465	4572745
IS08	172478305036	60.16	97.3	95.4	87.7	57.7	3783160	795265	4578425
IS09	177248695104	61.82	97.7	94	84	61.9	3782279	804336	4586615
IS10	166786760455	58.18	97.5	93.1	81.1	53.1	3799730	791333	4591063
IS11	169702121932	59.19	97.5	93.4	82.7	55.7	3791689	789117	4580806
IS12	178650002302	62.31	97.4	95.7	89.4	63.9	3804196	801049	4605245
IS13	170419496765	59.44	97.6	93.6	83.6	56.8	3777579	768418	4545997
IS14	168234876214	58.68	97.6	93.6	83.2	54.3	3787212	766952	4554164
IS15	186014420142	64.88	97.8	95	87.7	70.3	3800294	796956	4597250
IS16	175793280204	61.32	97.4	95.6	88.7	60.9	3804243	764423	4568666

## Sheet: Table S3
Supplementary Table S3. Copy number deletions called from whole-genome sequencing
Sample	Singleton/Trio	Manta	Manta (Filtered)	Canvas	Canvas (Filtered)	Called in both Manta and Canvas	Called in both Manta and Canvas (Filtered)	Called only in Manta (Further filtered)	Called only in Canvas (Further filtered)
IS01	Trio	7544	261	68	1	44	0	125	0
IS02	Trio	7695	231	271	4	47	0	117	0
IS03	Trio	7622	257	76	4	44	1	120	3
IS04	Trio	7832	259	229	2	51	1	135	0
IS05	Trio	7841	268	65	2	51	1	121	1
IS06	Trio	7884	264	63	0	38	1	131	0
IS07	Singleton	5002	151	72	2	46	0	85	1
IS08	Singleton	5115	138	242	1	53	0	85	0
IS09	Singleton	5159	148	61	3	49	0	96	2
IS10	Singleton	5029	131	63	2	45	0	80	1
IS11	Singleton	5070	151	66	1	47	0	92	0
IS12	Singleton	5219	148	257	2	51	0	94	0
IS13	Singleton	5157	165	67	3	45	1	106	2
IS14	Singleton	5092	134	76	6	45	0	86	3
IS15	Singleton	5532	155	71	1	41	0	104	0
IS16	Singleton	5403	151	243	3	43	1	94	0

## Sheet: Table S4
Supplementary Table S4. Filtered large deletions called in both Manta and Canvas
Sample	Chr	Start	End	Size (bp)	Variant type	Gene annotation	Parent with variant
IS03	chr2	193960861	194001273	40413	Het	Intergenic	Mom
IS04	chr2	13374974	13470465	95492	Het	Intergenic	Dad
IS05	chrX	35857025	35878356	21332	Hemi	Intergenic	Mom
IS06	chr12	26633278	26649939	16662	Het	NM_002223: ITPR2, exon 38-43	Mom
IS13	chr7	50222232	50235408	13177	Het	Intergenic	NA
IS16	chr2	36075764	36233275	157512	Het	Intergenic	NA
